# Supplementary material for: Maximizing transcription of nucleic acids with efficient T7 promoters
Source: PubMed Central journal article supplement (PMC7429497; doi:10.1038/s42003-020-01167-x), 2020-08-14
Supplement: 42003_2020_1167_MOESM3_ESM.pdf [file 42003_2020_1167_MOESM3_ESM.pdf]

## **Description of additional supplementary files**

**Supplementary Data 1:** 5'RACE ranked motifs

**Supplementary Data 2:** DNA oligos used in this study
